# Supplementary material
Source: ML conference proceedings conference paper supplement (https://openreview.net/forum?id=qUfLsi3Vlm)

# Rabbit v/s Duck

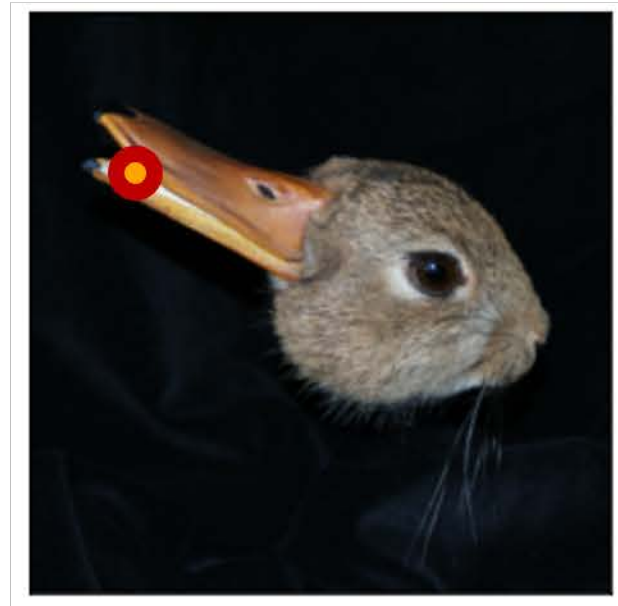

Initial Fixation  
Points

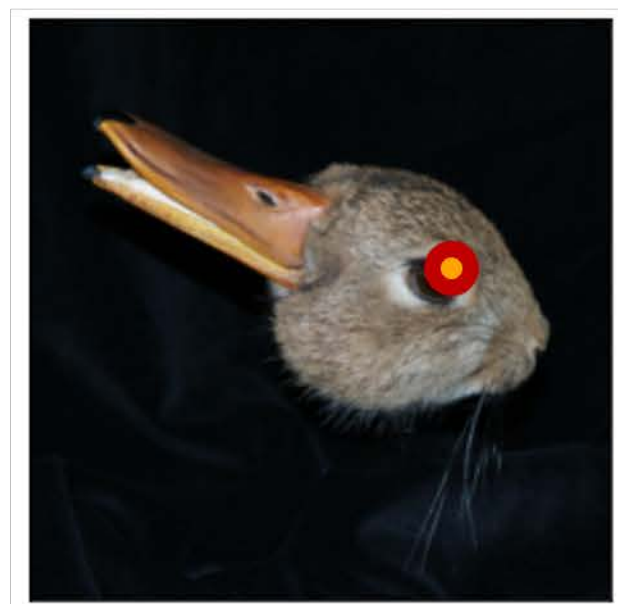

FALcon  
Predictions

Output Bounding  
Boxes

“Foveated Glimpses”  
observed by  
the model

Rabbit

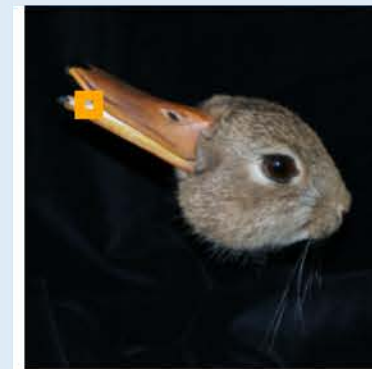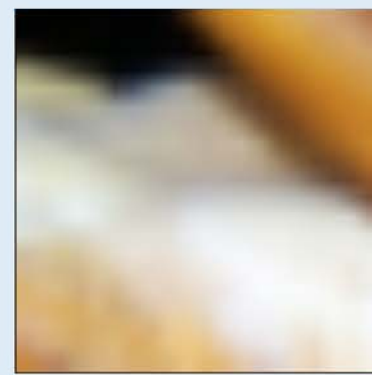

Rabbit

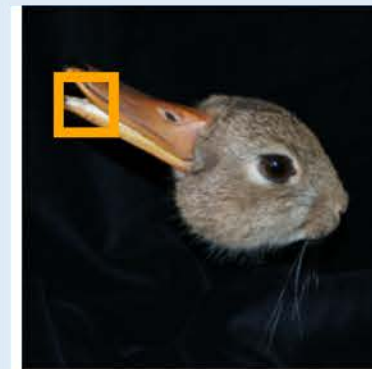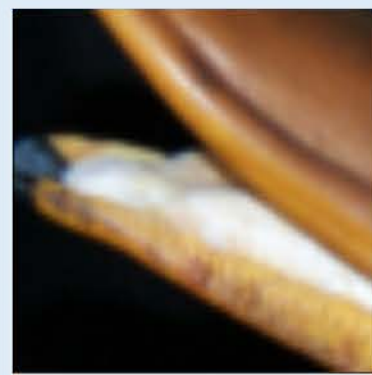

Rabbit

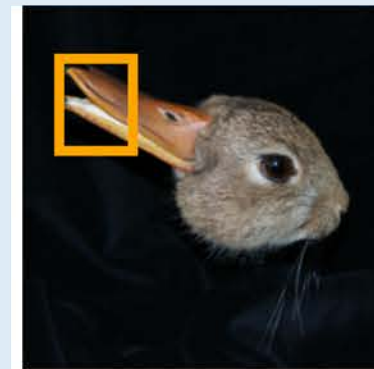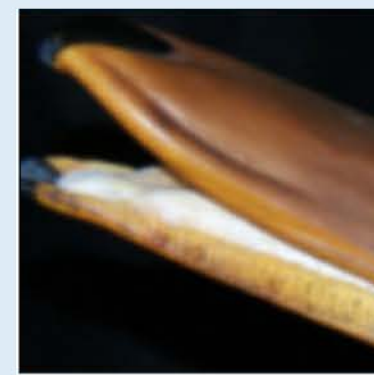

Rabbit

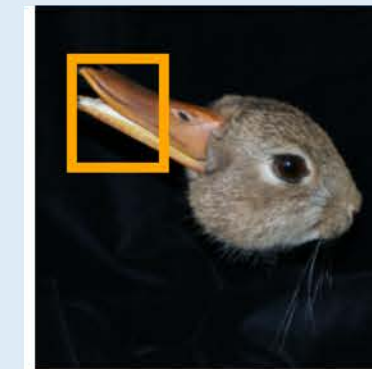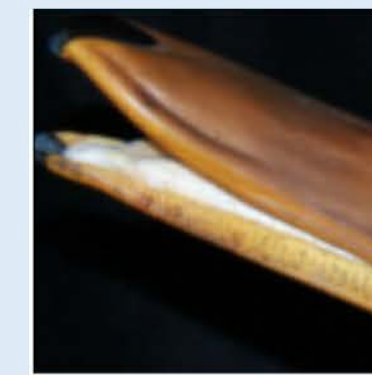

Duck

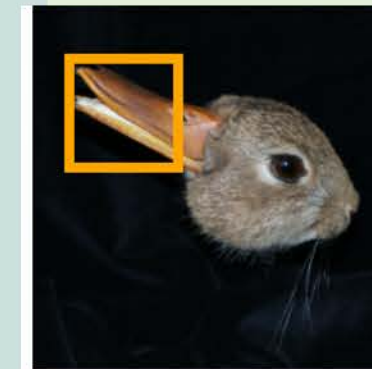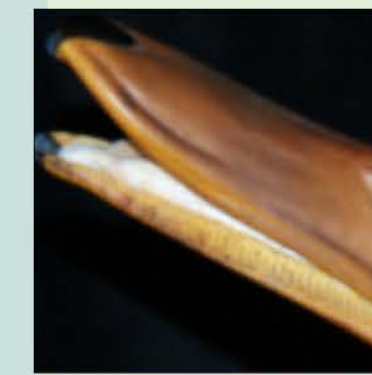

Duck

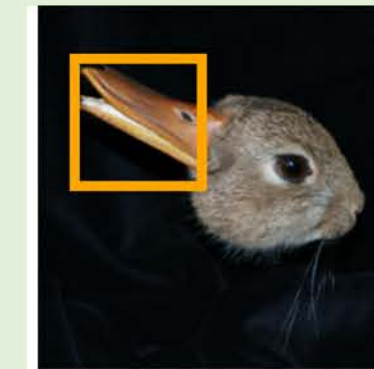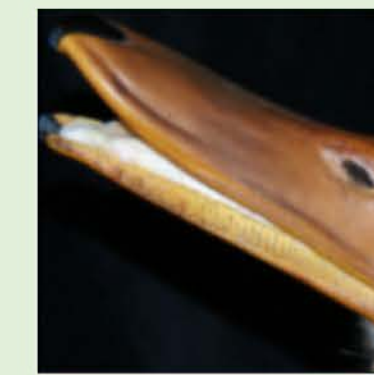

Duck

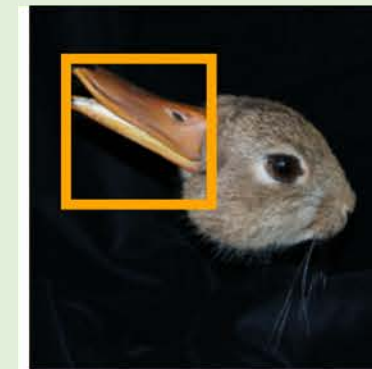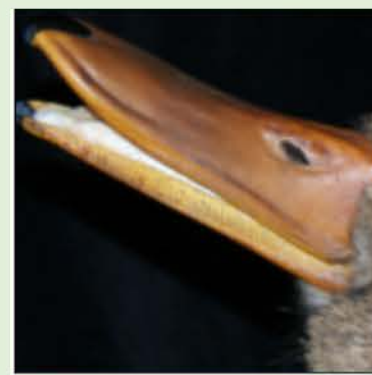

...

Duck

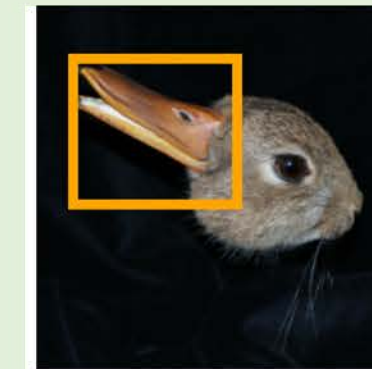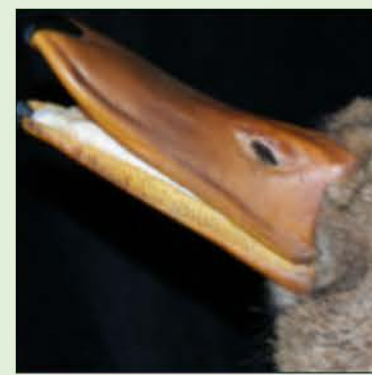

Foveated Sequence

Rabbit

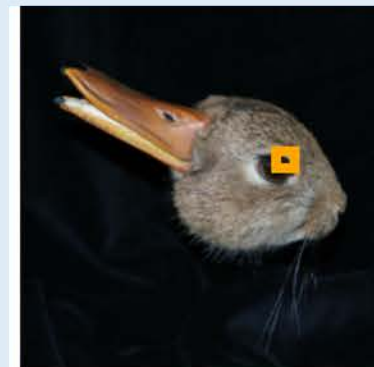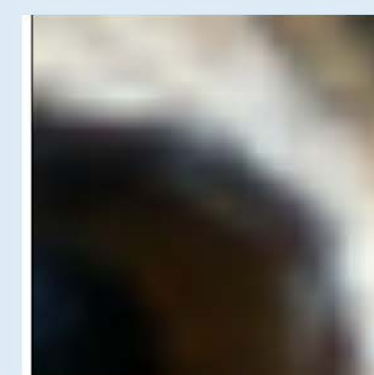

Rabbit

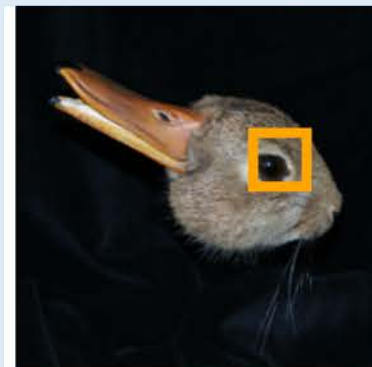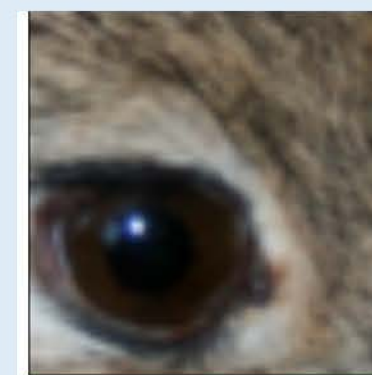

Rabbit

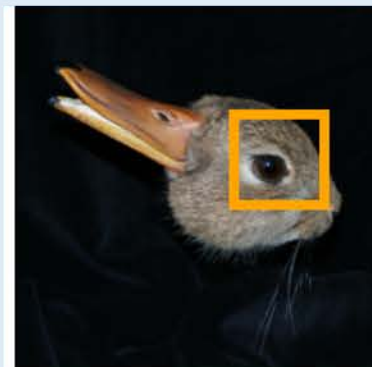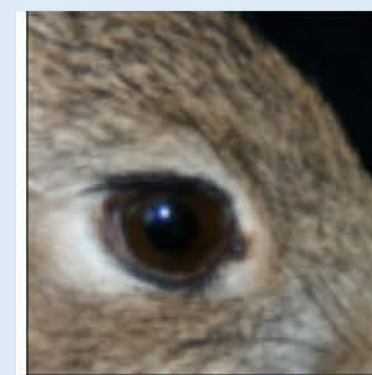

Rabbit

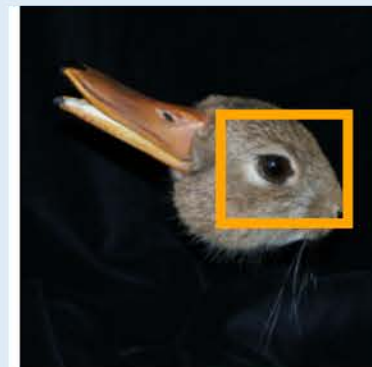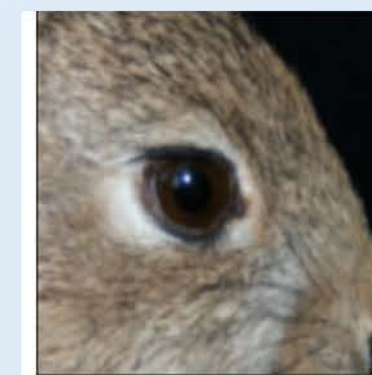

Rabbit

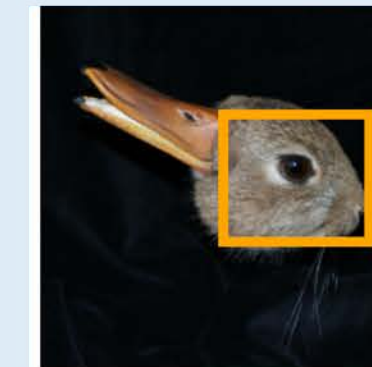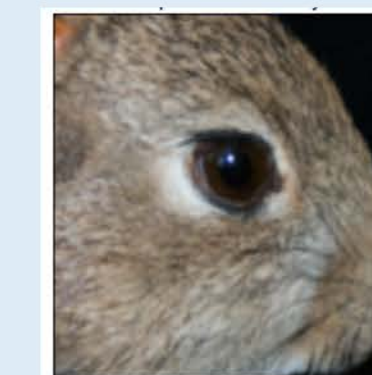

Rabbit

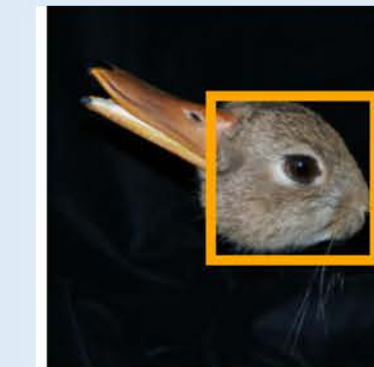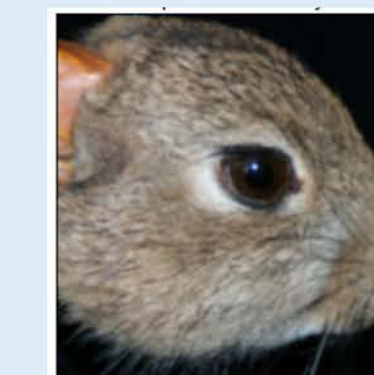

Rabbit

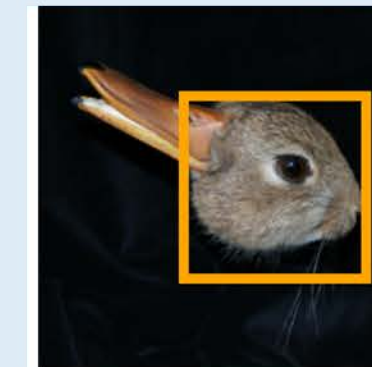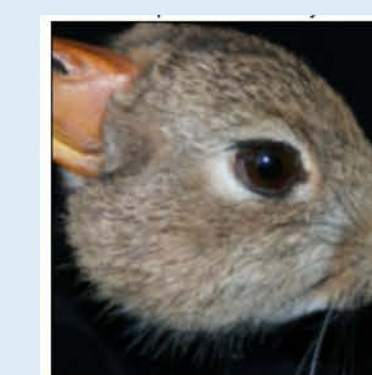

...

Rabbit

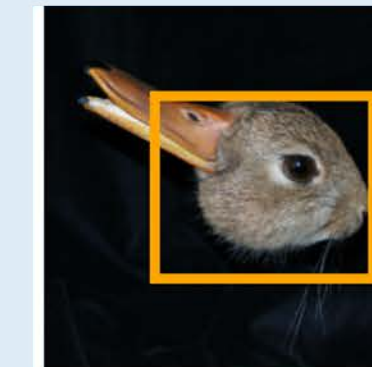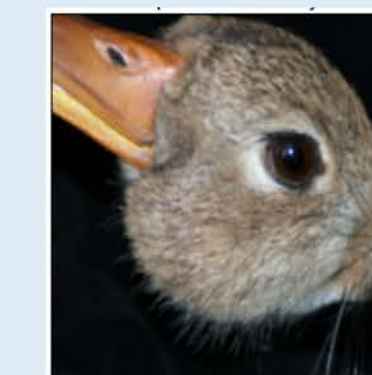

Supplement: supplementary_material [file attachment]
