# Supplementary material
Source: ML conference proceedings conference paper supplement (https://openreview.net/forum?id=qUfLsi3Vlm)
Supplement: supplementary_material [file attachment]

...

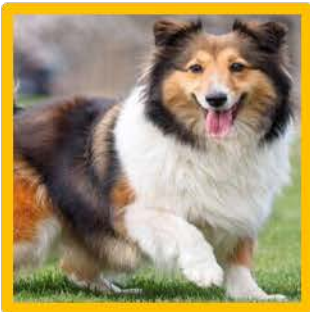

(a) foveated  
region  
at  $t - 1$

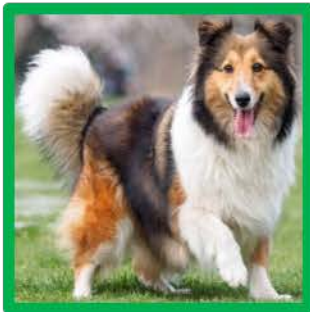

(b) foveated  
region  
at  $t$

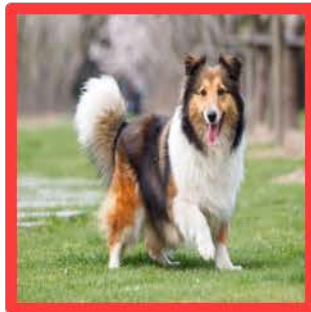

(c) foveated  
region  
at  $t + 1$

...

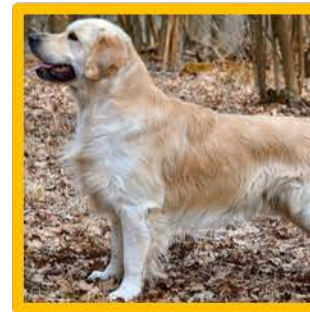

(d) sample with  
partial "pseudo"  
bounding box

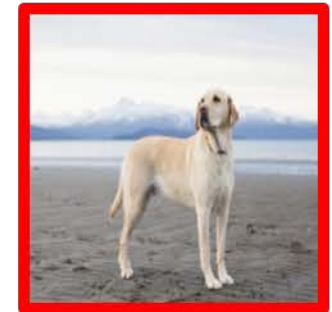

(e) sample with  
loose "pseudo"  
bounding box
