# Supplementary material
Source: ML conference proceedings conference paper supplement (https://openreview.net/forum?id=qUfLsi3Vlm)
Supplement: supplementary_material [file attachment]

# Standard Computer Vision Methods

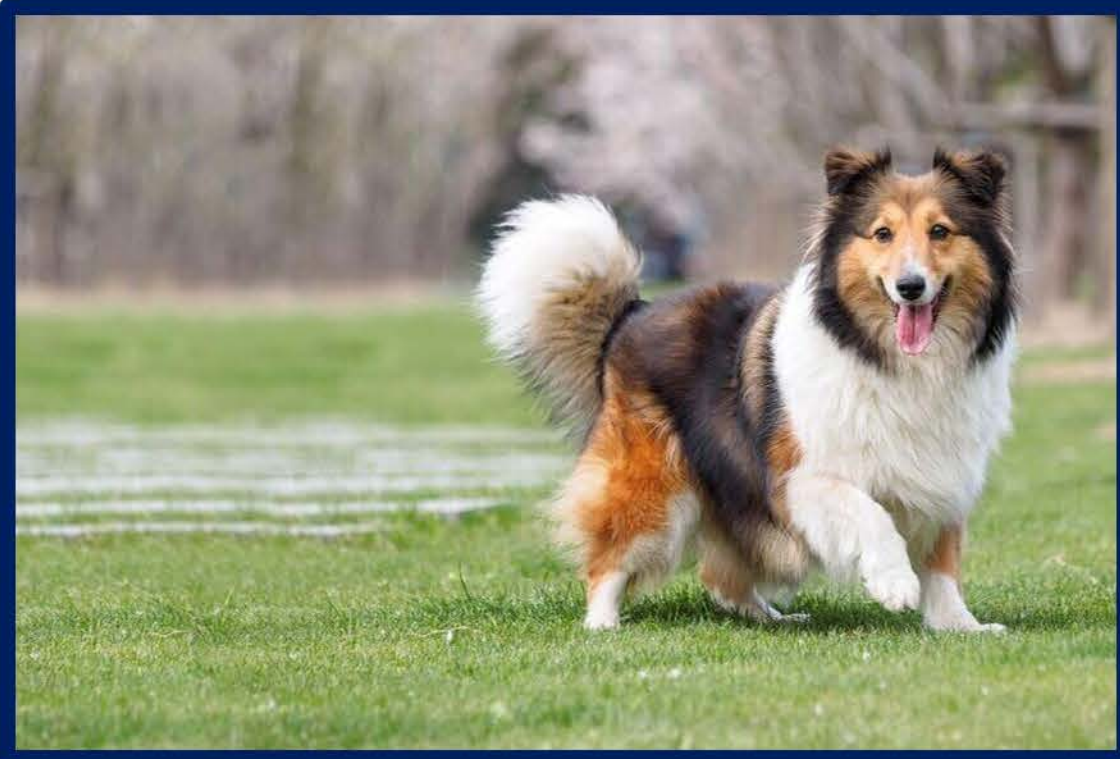

Sample 1, Class "dog"

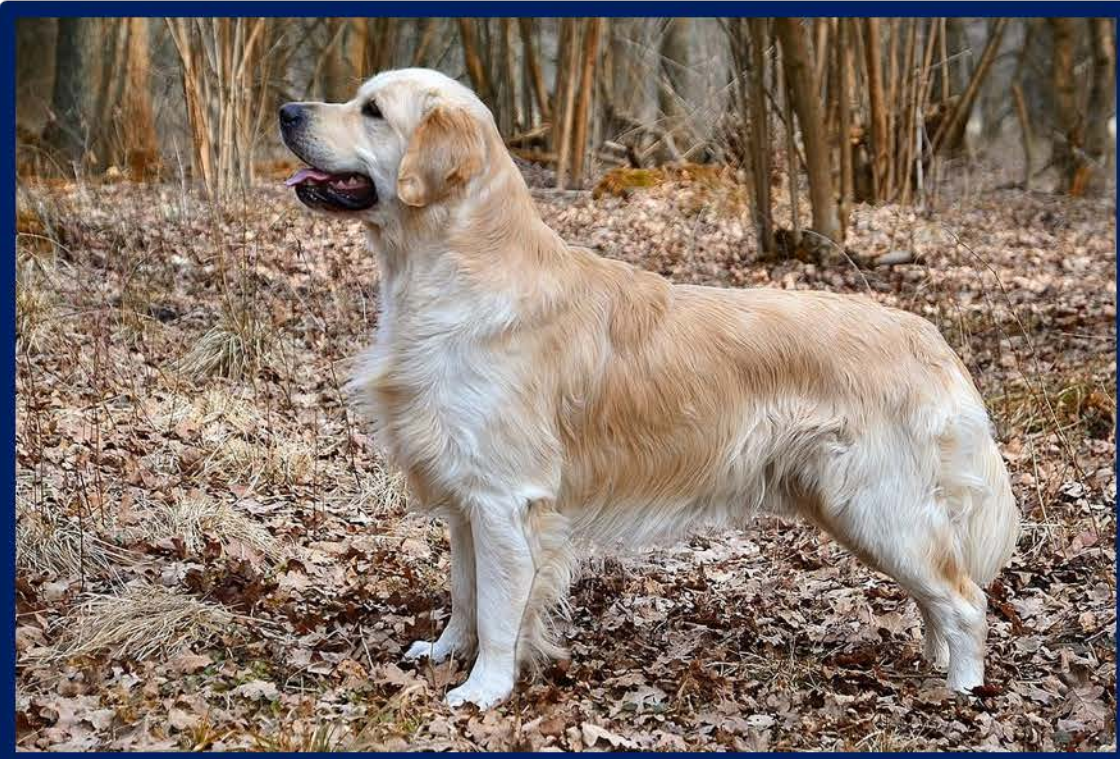

Sample 2, Class "dog"

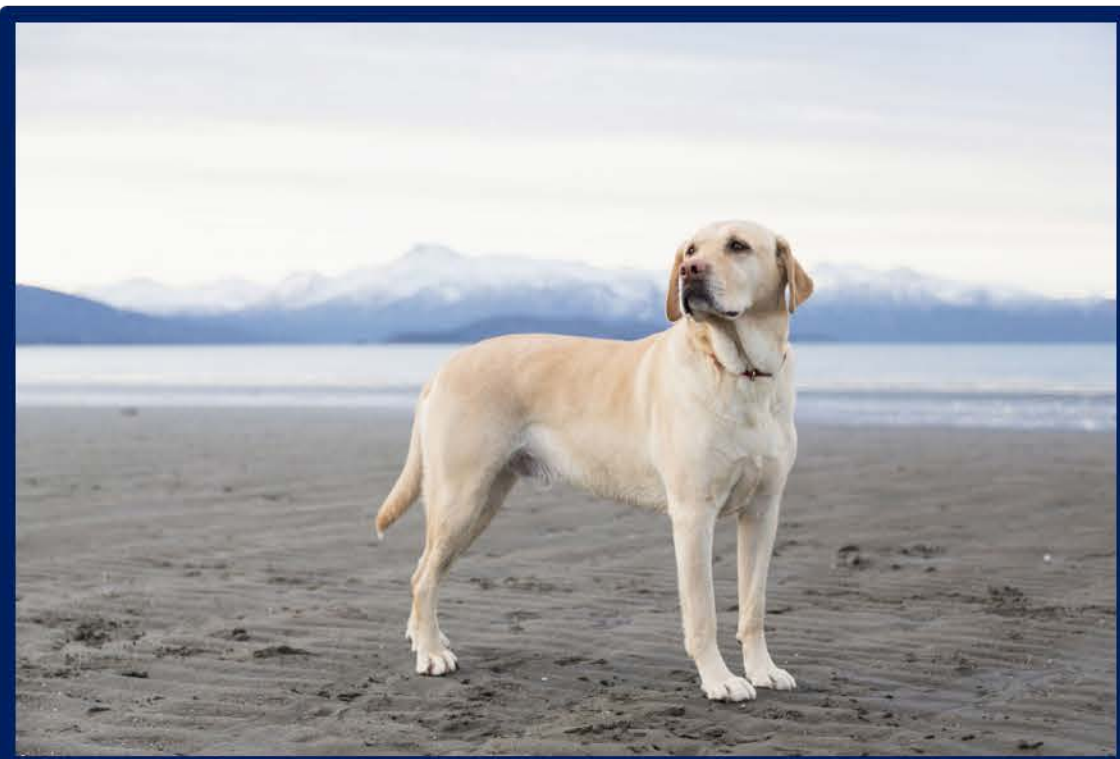

Sample 3, Class "dog"

Intra-class  
Inter-sample  
views

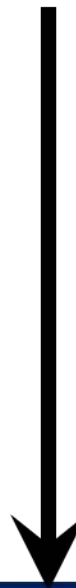

**DNN**

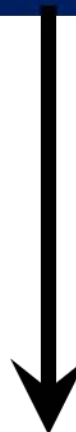

set of features  
used for training
