# Supplementary material
Source: ML conference proceedings conference paper supplement (https://openreview.net/forum?id=qUfLsi3Vlm)

PASCAL VOC07  
DATASET  
(a)

PSOL predictions  
“pseudo” bounding box  
with input ground truth

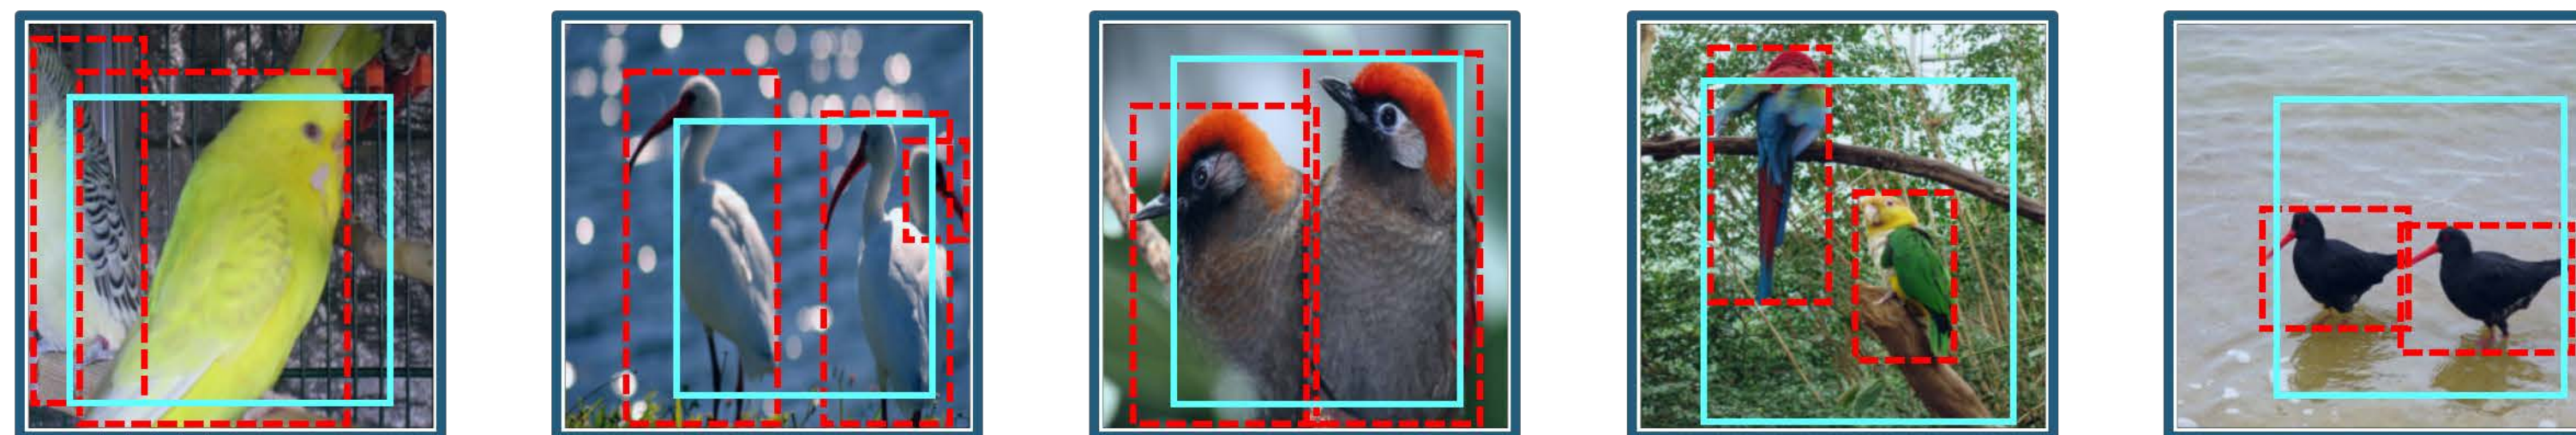

FALcon predictions  
output bounding box(es)

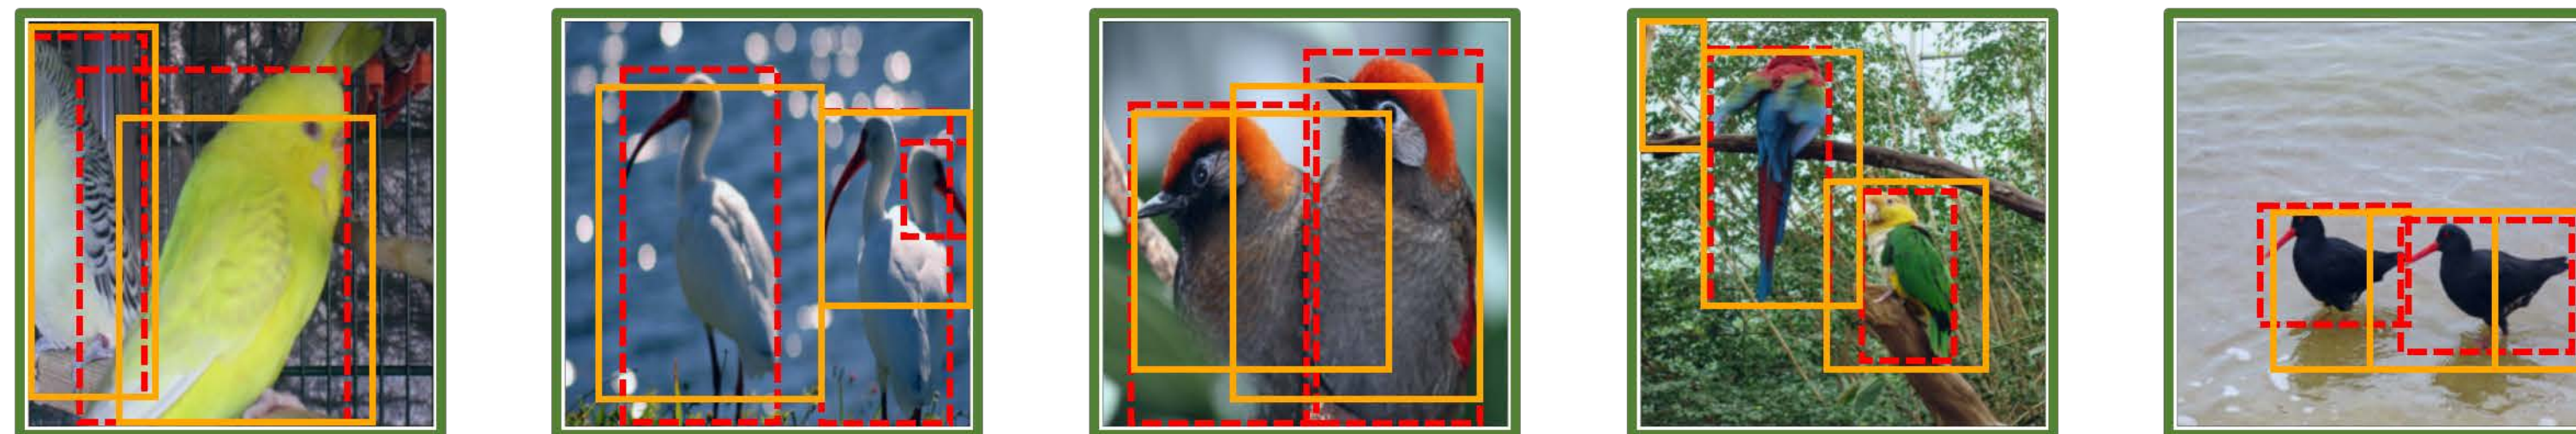

IMAGENET13-DET  
DATASET  
(b)

PSOL predictions  
“pseudo” bounding box  
with input ground truth

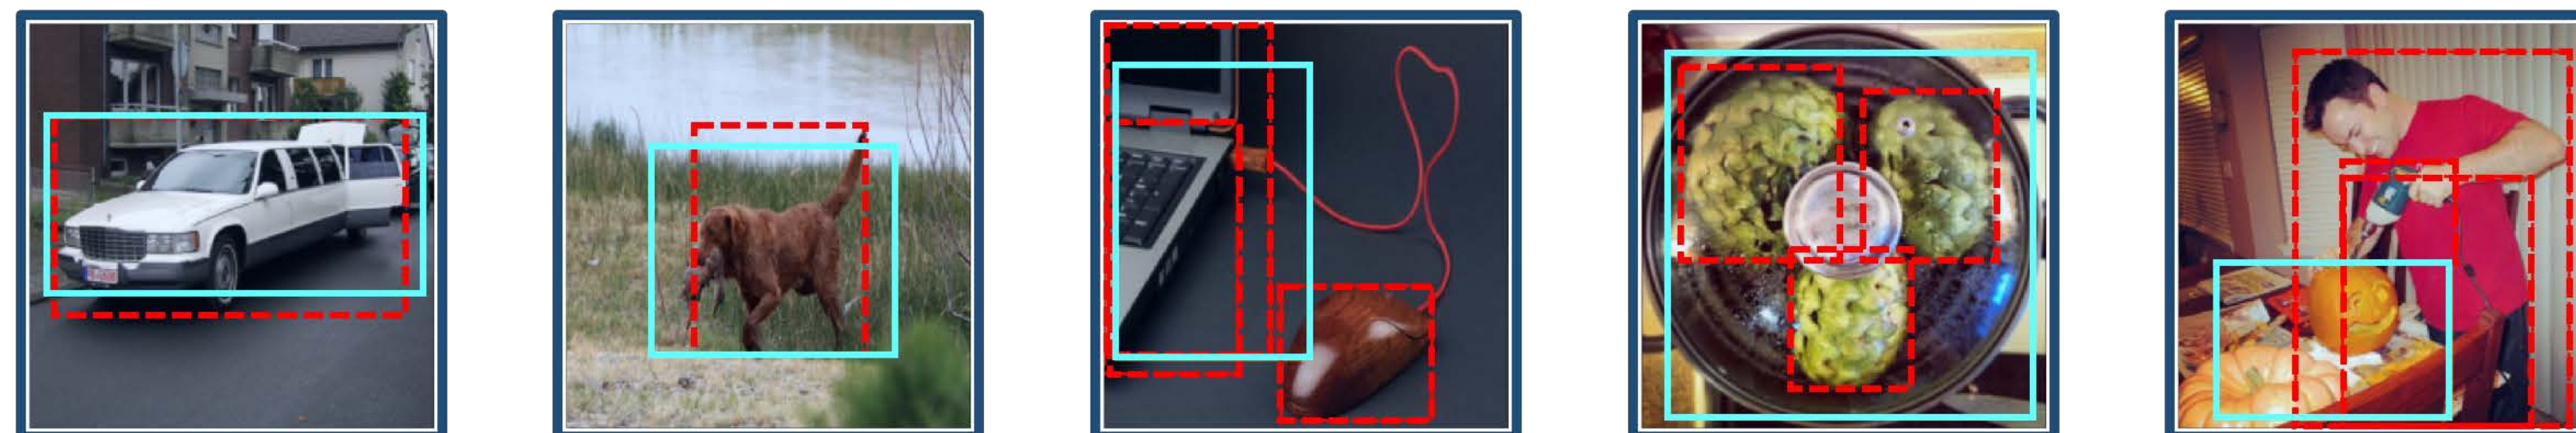

FALcon predictions  
output bounding box(es)

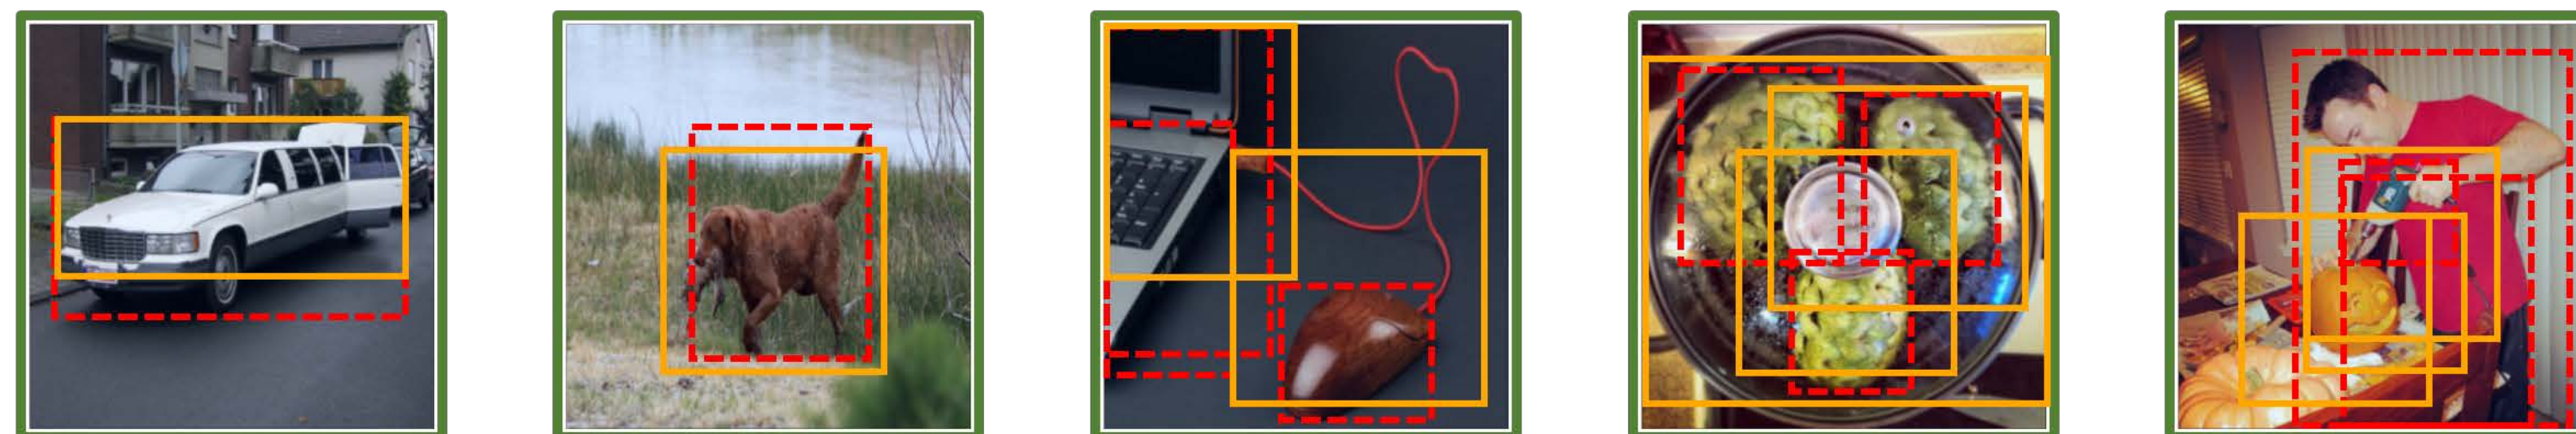

Supplement: supplementary_material [file attachment]
