# Supplementary material
Source: ML conference proceedings conference paper supplement (https://openreview.net/forum?id=qUfLsi3Vlm)
Supplement: supplementary_material [file attachment]

# Method with Foveation and Saccades

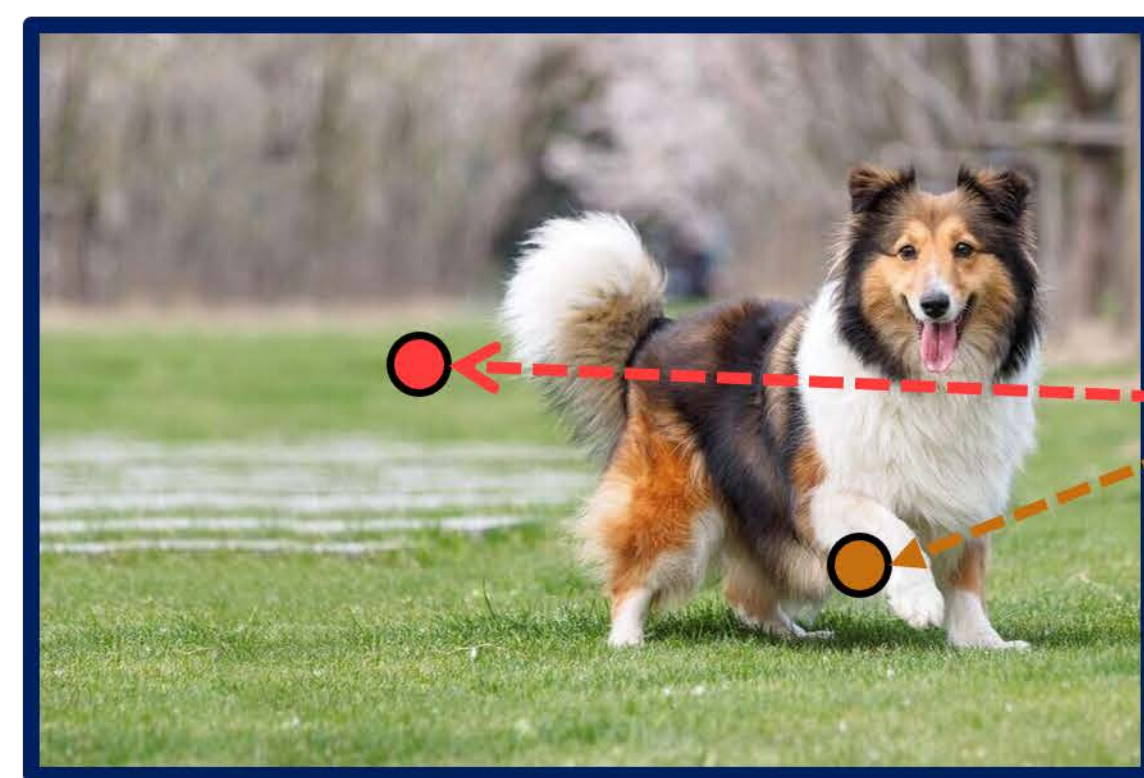

Sample 1, Class "dog"

F & S

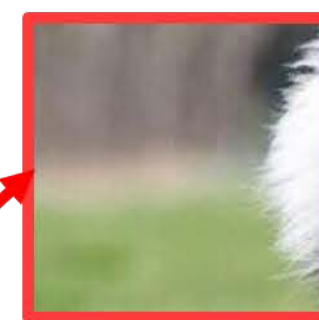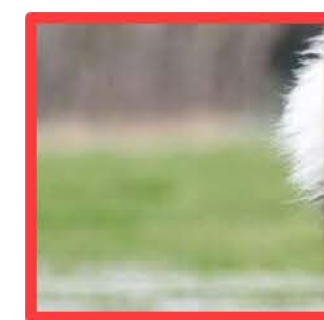

...

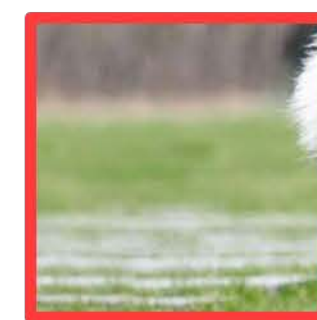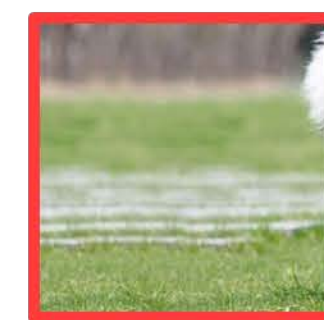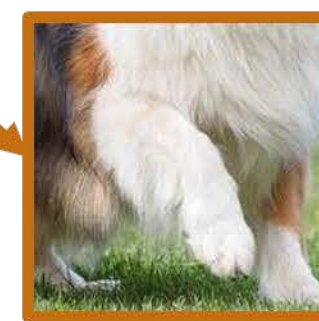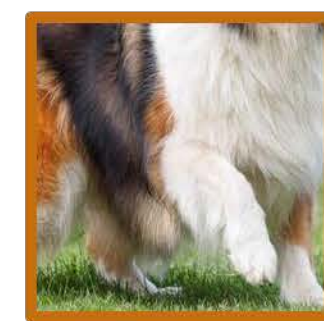

...

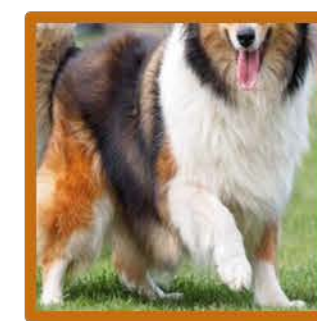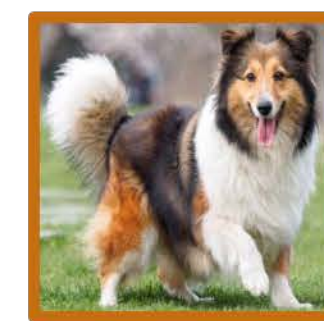

Intra-sample  
views of  
sample 1

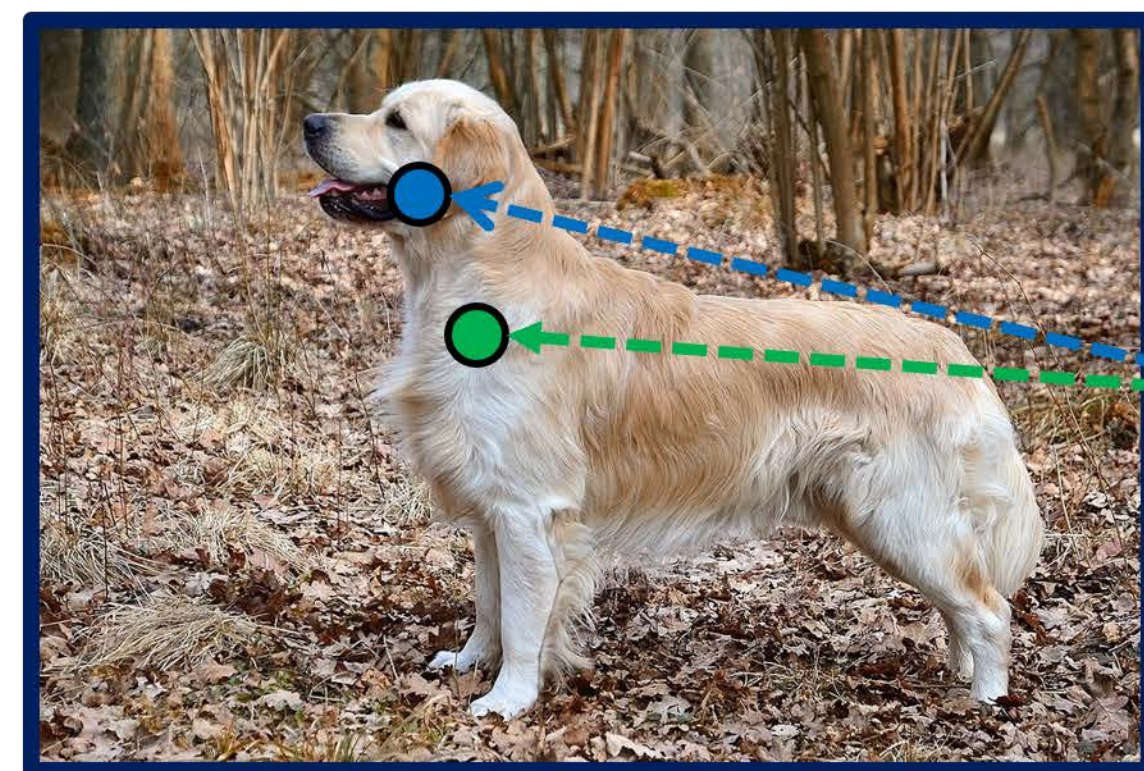

Sample 2, Class "dog"

F & S

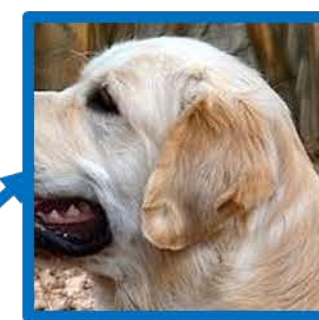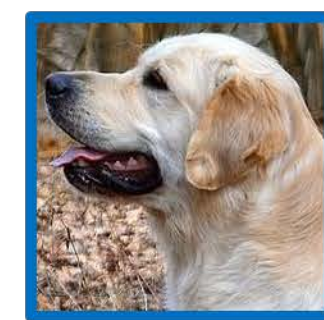

...

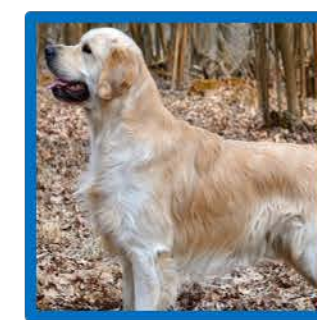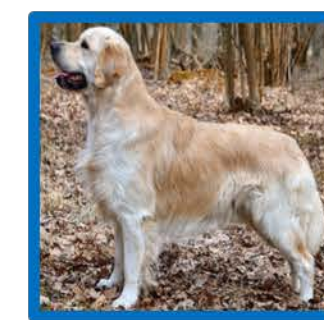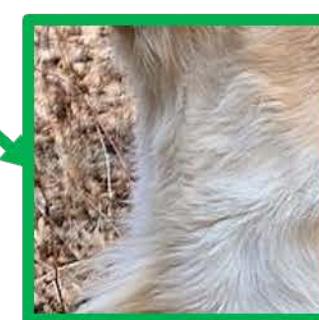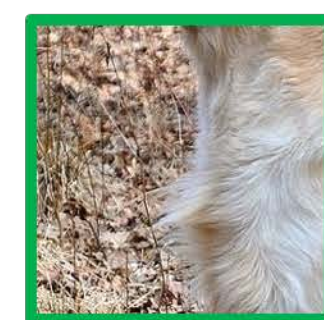

...

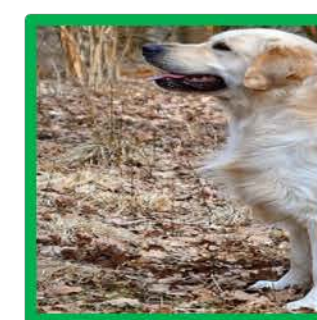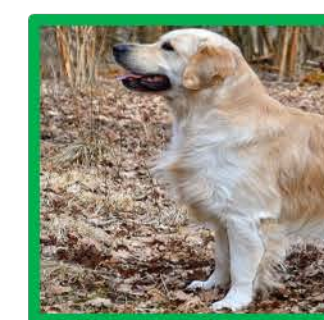

Intra-sample  
views of  
sample 2

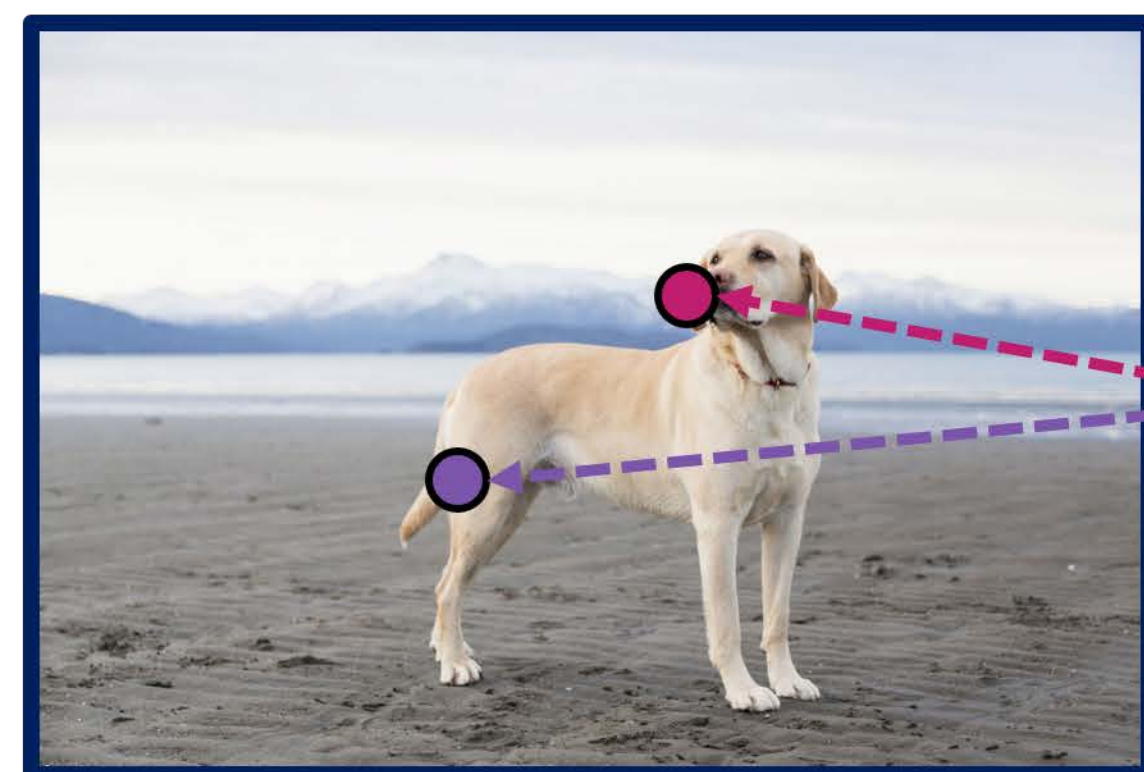

Sample 3, Class "dog"

F & S

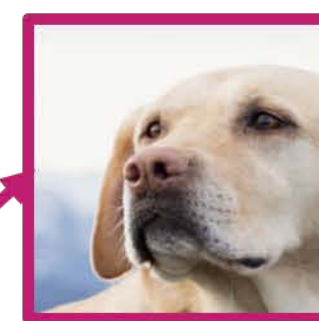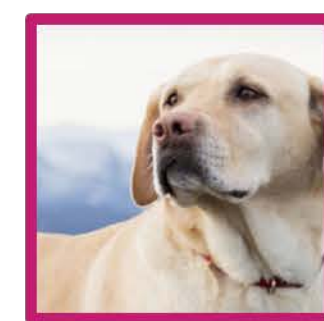

...

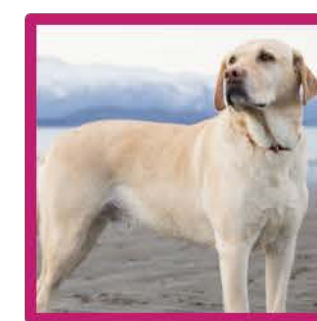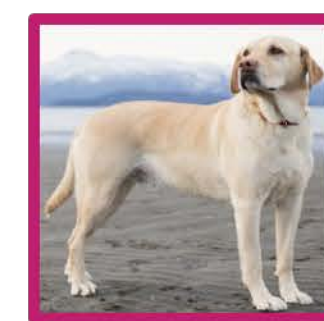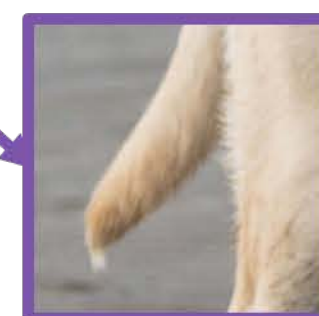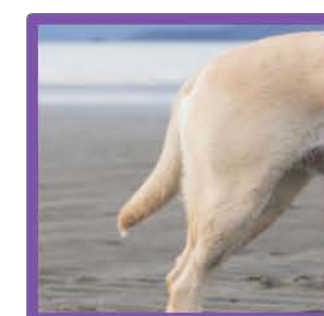

...

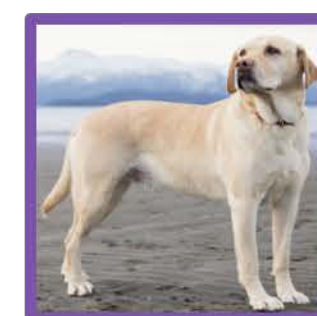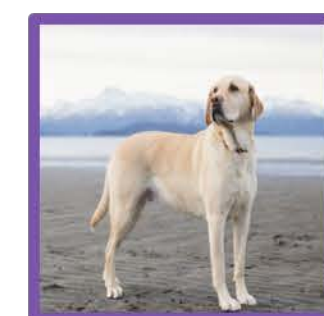

Intra-sample  
views of  
sample 3

Intra-class  
Inter-sample  
views

DNN

diverse and  
expanded  
set of features  
used for training
