# Supplementary material
Source: ML conference proceedings conference paper supplement (https://openreview.net/forum?id=qUfLsi3Vlm)

# CUB Dataset

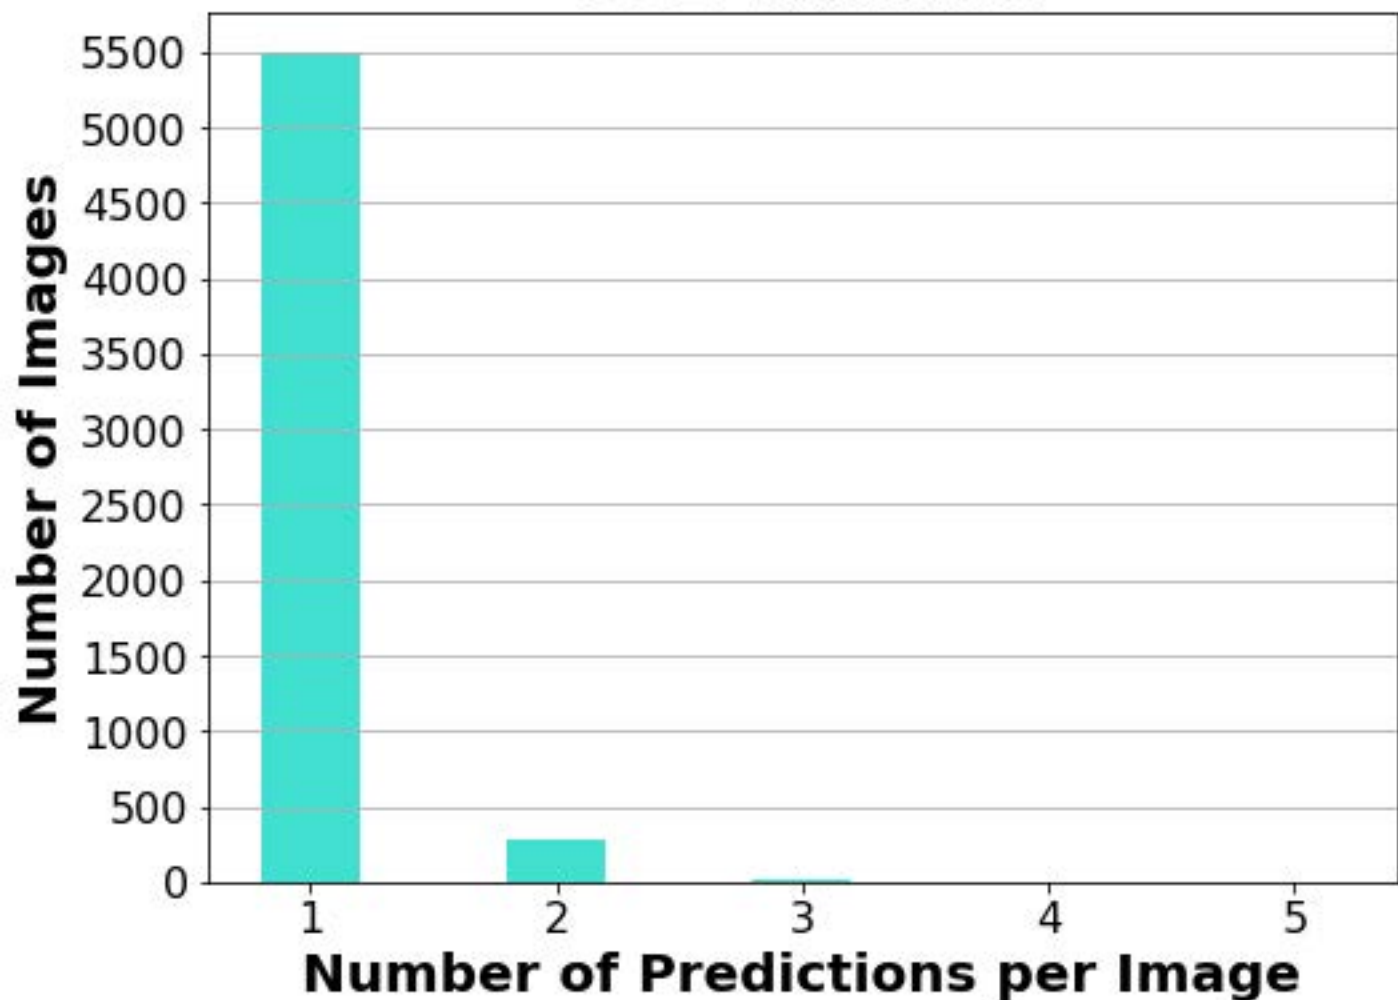

Supplement: supplementary_material [file attachment]

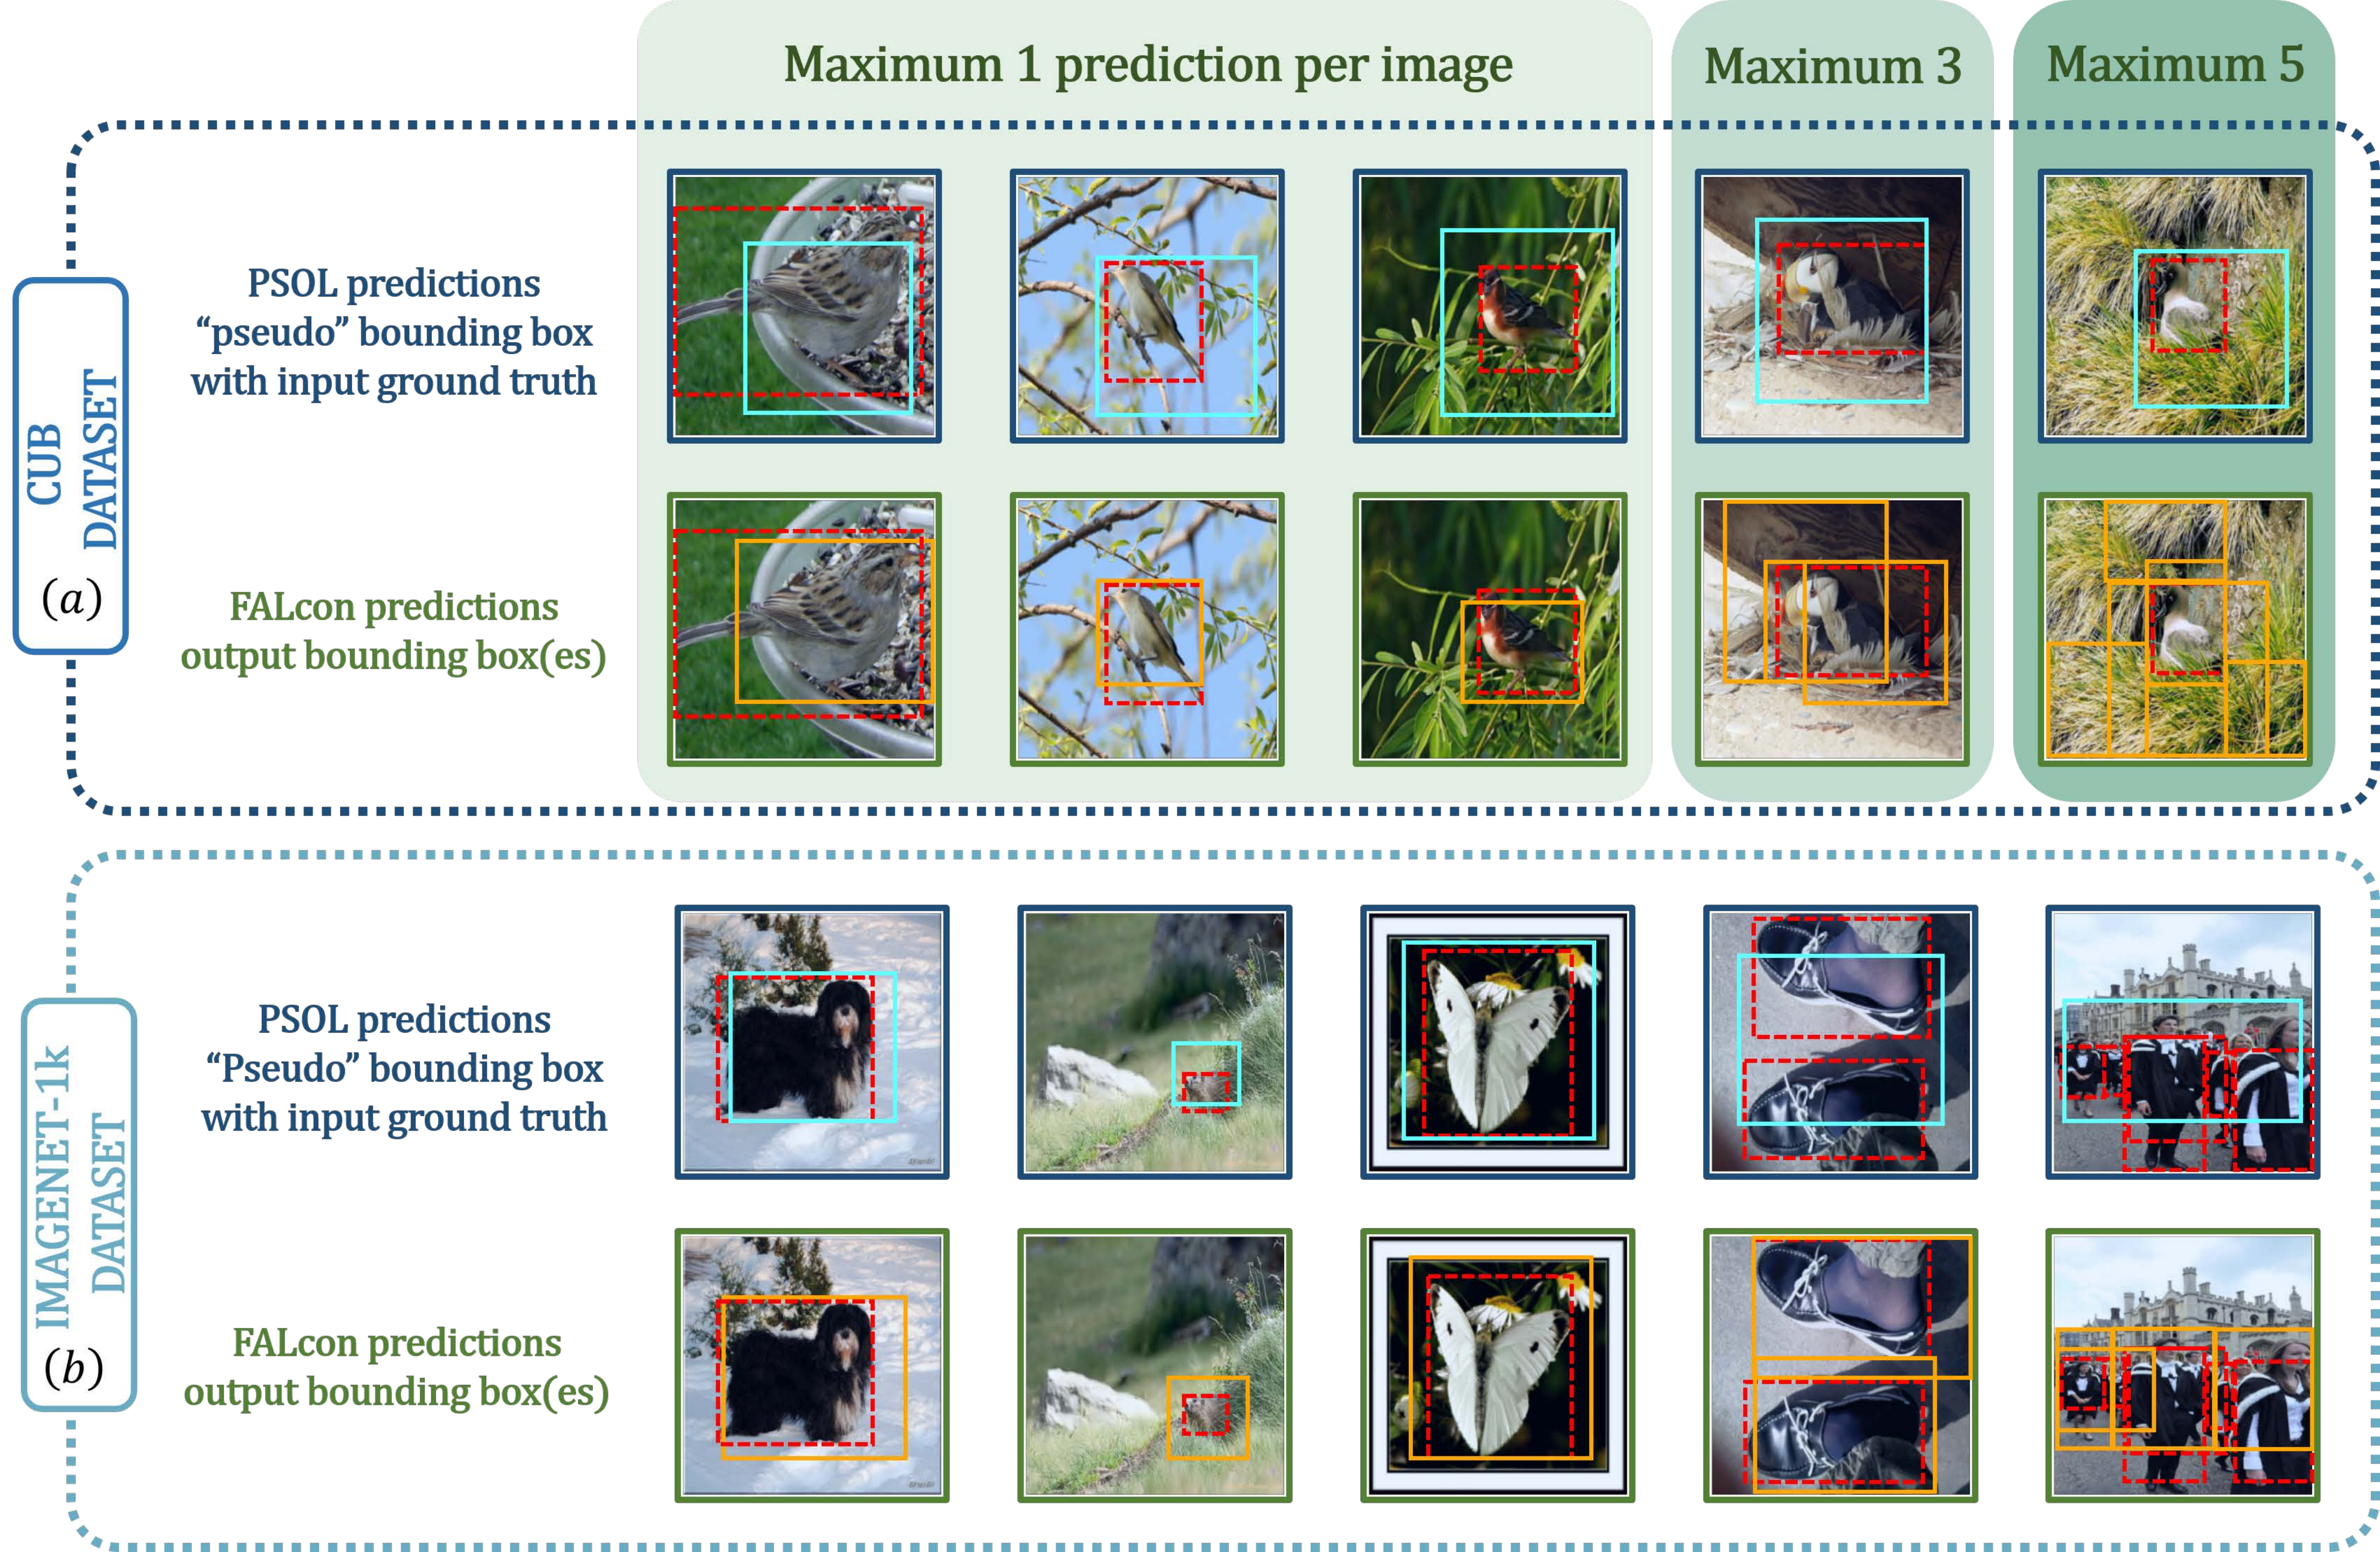

Supplement: supplementary_material [file attachment]

## WSOL Only

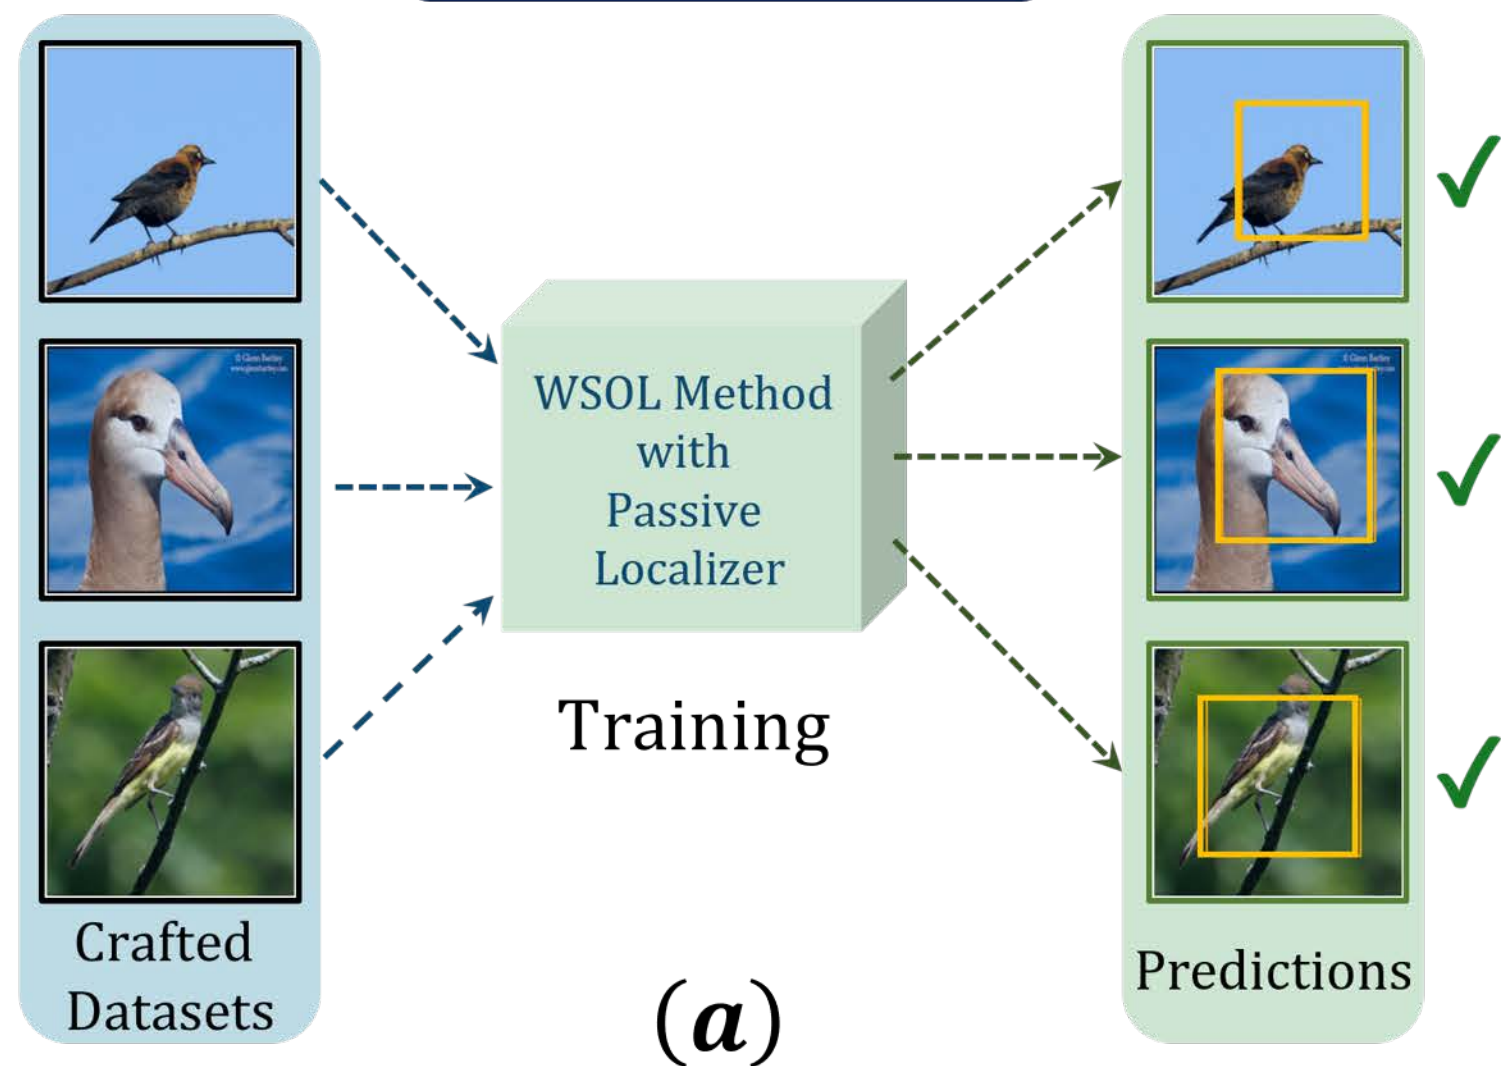

## WSOL with FALcon

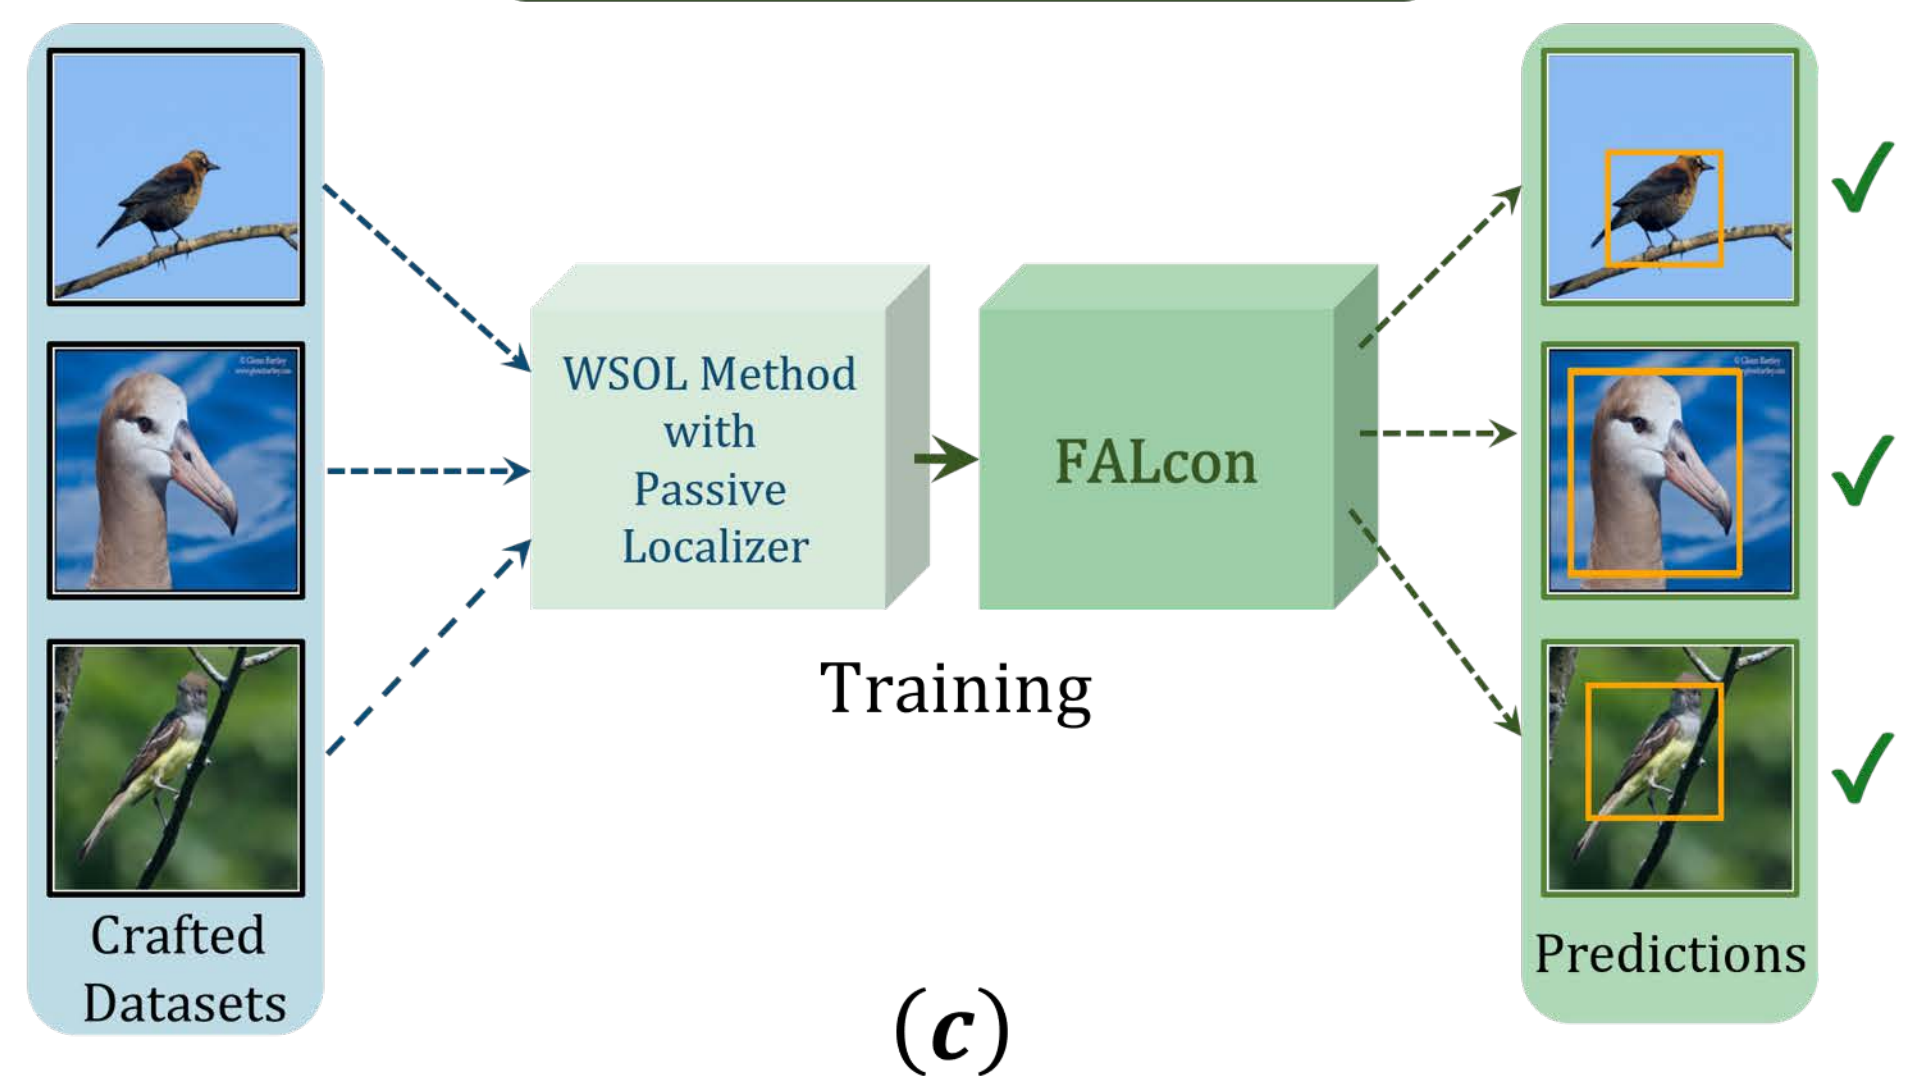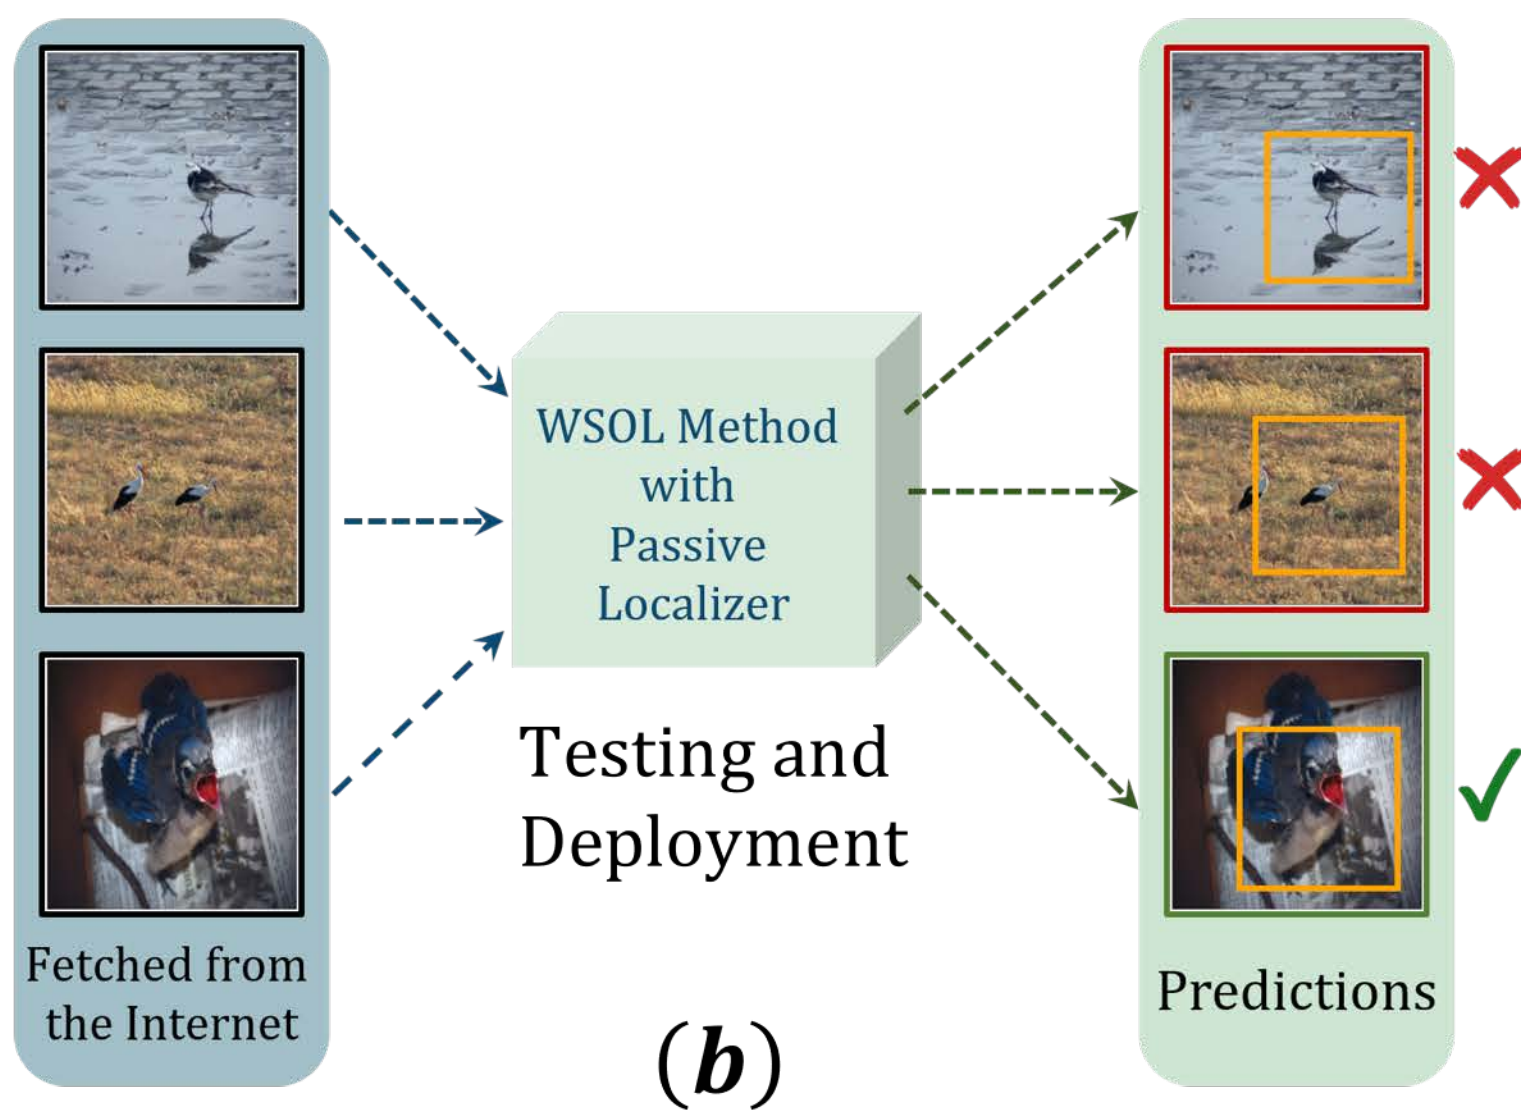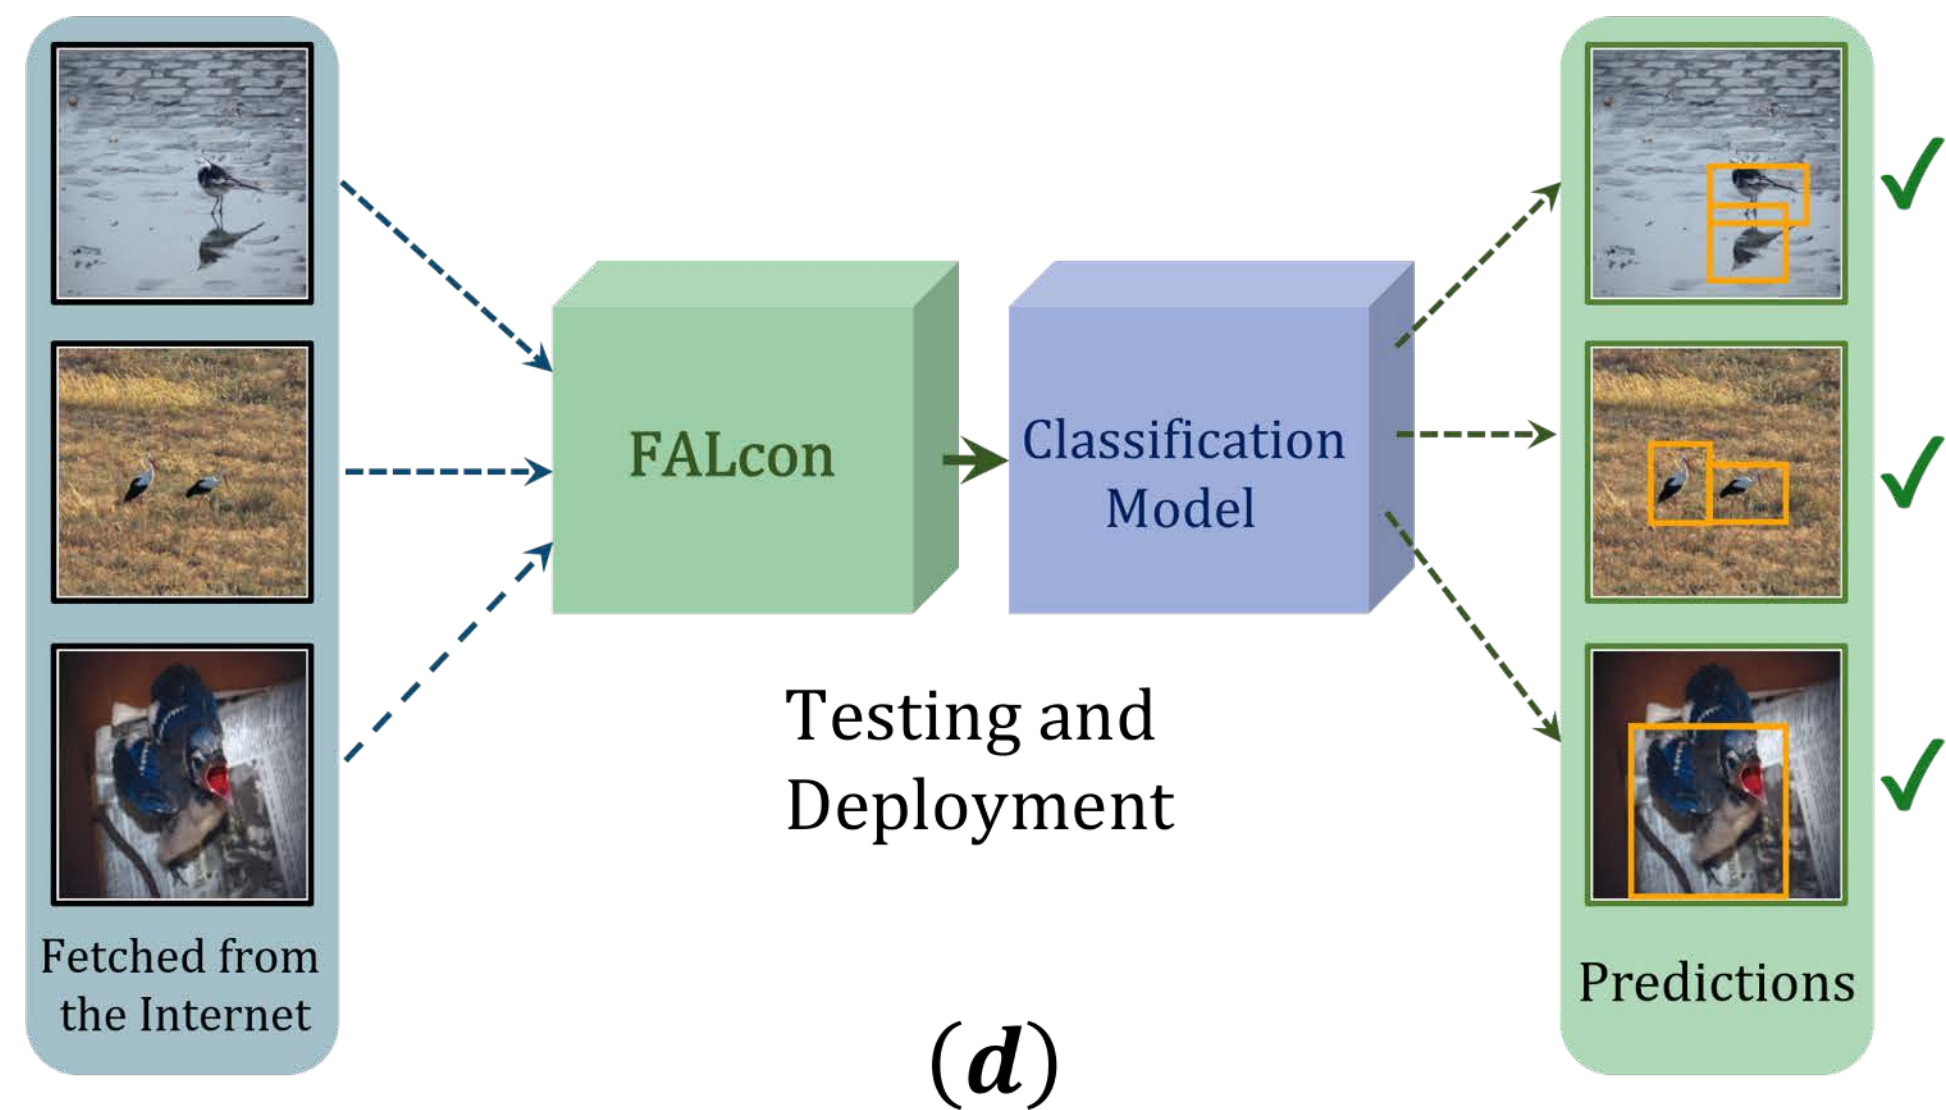

Supplement: supplementary_material [file attachment]

# Imagenet Dataset

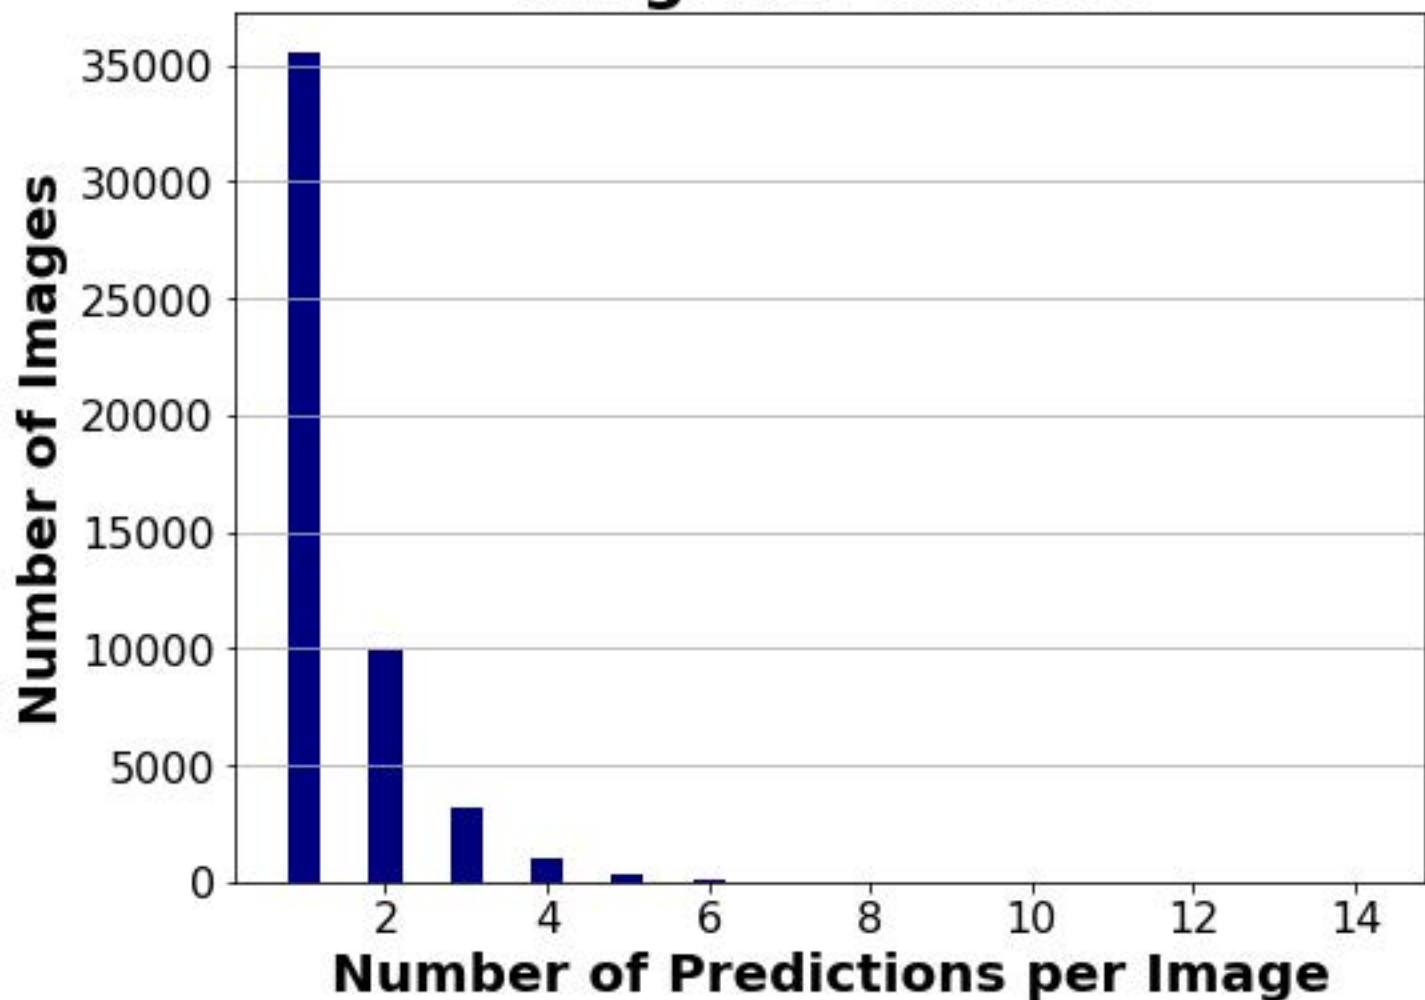

Supplement: supplementary_material [file attachment]
